# Supplementary material for: Multitask possibilistic and fuzzy co-clustering algorithm for clustering data with multisource features
Source: Springer Nature journal article supplement (doi:10.1007/s00521-018-3851-0), 2018-11-08
Supplement: 521_2018_3851_MOESM1_ESM.pdf [file 521_2018_3851_MOESM1_ESM.pdf]

FMI

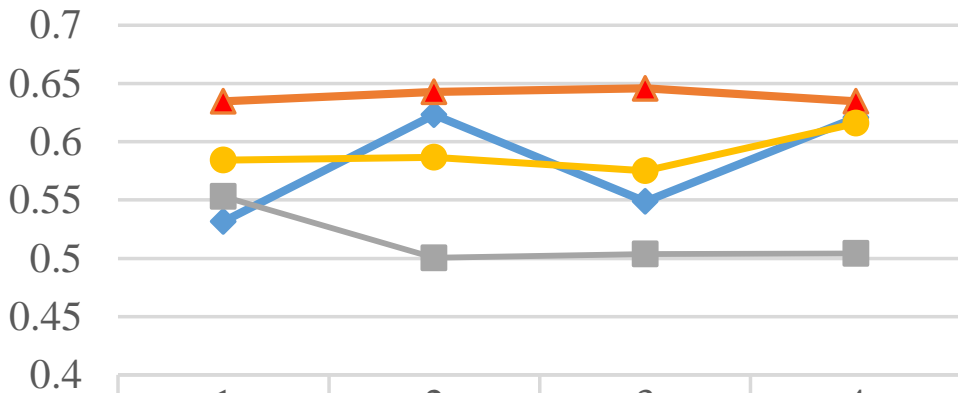

◆ batch6 kmeans

0.5316

0.6231

0.5488

0.6205

▲ batch6 MPFC

0.6347

0.6429

0.6459

0.6347

■ segment kmeans

0.553

0.5005

0.5035

0.504

● segment MPFC

0.5843

0.5869

0.5751

0.6158
