# Supplementary material for: Multitask possibilistic and fuzzy co-clustering algorithm for clustering data with multisource features
Source: Springer Nature journal article supplement (doi:10.1007/s00521-018-3851-0), 2018-11-08
Supplement: 521_2018_3851_MOESM2_ESM.pdf [file 521_2018_3851_MOESM2_ESM.pdf]

Jaccard

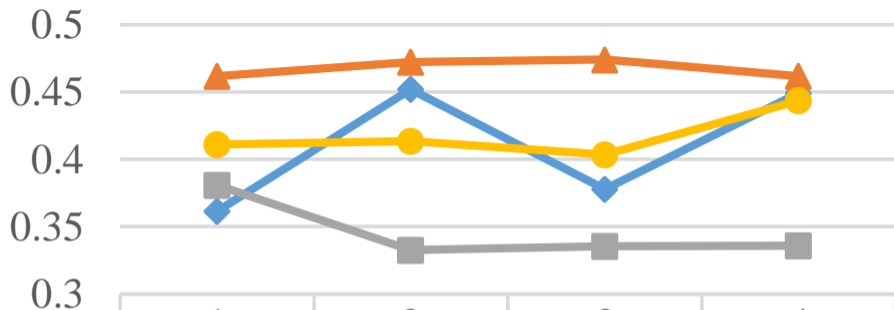

|                | 1      | 2      | 3      | 4      |
|----------------|--------|--------|--------|--------|
| batch6 kmeans  | 0.3615 | 0.452  | 0.3781 | 0.4493 |
| batch6 MPFC    | 0.4618 | 0.4724 | 0.4742 | 0.4618 |
| segment kmeans | 0.3809 | 0.3327 | 0.3355 | 0.3359 |
| segment MPFC   | 0.4112 | 0.4137 | 0.4036 | 0.4436 |
