# Supplementary material for: Multitask possibilistic and fuzzy co-clustering algorithm for clustering data with multisource features
Source: Springer Nature journal article supplement (doi:10.1007/s00521-018-3851-0), 2018-11-08
Supplement: 521_2018_3851_MOESM3_ESM.pdf [file 521_2018_3851_MOESM3_ESM.pdf]

Number

1700  
1600  
1500  
1400  
1300  
1200  
1100

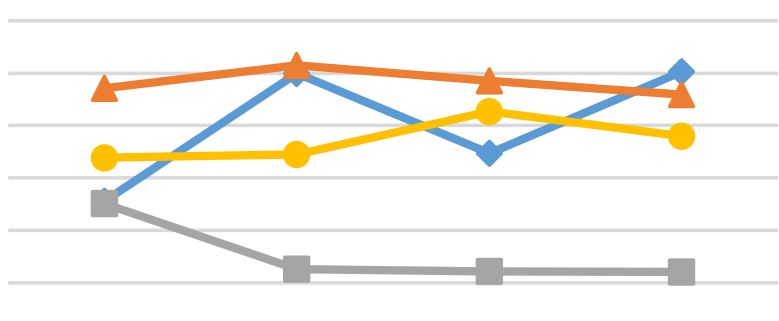

|                | 1    | 2    | 3    | 4    |
|----------------|------|------|------|------|
| batch6 kmeans  | 1356 | 1600 | 1447 | 1603 |
| batch6 MPFC    | 1571 | 1615 | 1585 | 1559 |
| segment kmeans | 1351 | 1226 | 1222 | 1221 |
| segment MPFC   | 1439 | 1445 | 1527 | 1480 |
