# Supplementary material for: Multitask possibilistic and fuzzy co-clustering algorithm for clustering data with multisource features
Source: Springer Nature journal article supplement (doi:10.1007/s00521-018-3851-0), 2018-11-08
Supplement: 521_2018_3851_MOESM4_ESM.pdf [file 521_2018_3851_MOESM4_ESM.pdf]

REC

40  
35  
30  
25  
20  
15  
10  
5  
0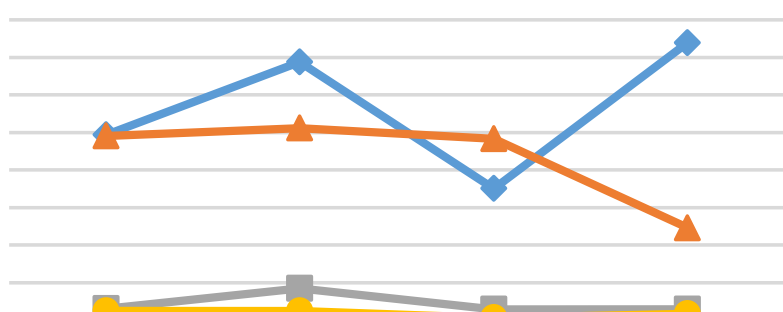

1

2

3

4

batch6 kmeans

24.6912

34.4091

17.5251

36.9625

batch6 MPFC

24.5666

25.5746

24.1669

12.3208

segment kmeans

1.5545

4.2454

1.4499

1.4551

segment MPFC

1.2494

1.218

0.3135

0.8481
