# Supplementary material for: Multitask possibilistic and fuzzy co-clustering algorithm for clustering data with multisource features
Source: Springer Nature journal article supplement (doi:10.1007/s00521-018-3851-0), 2018-11-08
Supplement: 521_2018_3851_MOESM5_ESM.pdf [file 521_2018_3851_MOESM5_ESM.pdf]

RI

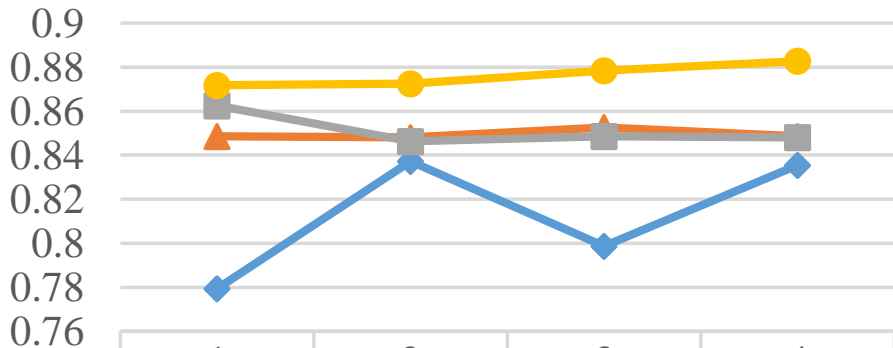

|                | 1      | 2      | 3      | 4      |
|----------------|--------|--------|--------|--------|
| batch6 kmeans  | 0.7794 | 0.8372 | 0.7987 | 0.8355 |
| batch6 MPFC    | 0.8486 | 0.8481 | 0.8526 | 0.8486 |
| segment kmeans | 0.8625 | 0.8463 | 0.8485 | 0.8481 |
| segment MPFC   | 0.8718 | 0.8726 | 0.8785 | 0.8827 |
